# Supplementary material for: Effect of Hydrothermal Treatment on Structural and Catalytic Properties of [CTA]-MCM-41 Silica
Source: MDPI journal article supplement (doi:10.3390/ma11050860), 2018-05-21
Supplement: s1 [file s1]

Supplementary material

# Effect of Hydrothermal Treatment on Structural and Catalytic Properties of [CTA]-MCM-41 Silica

Iago W. Zapelini, Laura L. Silva and Dilson Cardoso \*

Received: date; Accepted: date; Published: date

*Calculation of [CTA<sup>+</sup>]/[SiO<sub>2</sub>] ratio in hybrid silicas*

In order to obtain the content of catalytic sites ( $\equiv\text{SiO}^-$ ) using thermogravimetric analysis, the molar ratio of [CTA<sup>+</sup>]/[SiO<sub>2</sub>] were calculated based on CTA<sup>+</sup> decomposition observed by DTG curves, according to the Equation S1:

$$\frac{[\text{CTA}^+]}{[\text{SiO}_2]} = \frac{\frac{m_{2-3}}{MM_{\text{CTA}^+}}}{\frac{m_{\text{SiO}_2}}{MM_{\text{SiO}_2}}} \quad (\text{S1})$$

where  $m_{2-3}$  is the mass loss in regions (2) and (3) of the thermograms,  $MM_{\text{CTA}^+}$  is the molar mass of CTA<sup>+</sup> cation,  $m_{\text{SiO}_2}$  is the remaining mass after thermal analysis and  $MM_{\text{SiO}_2}$  is the molar mass of the silica.

*Calculation of [ $\equiv\text{SiOH}$ ]/[SiO<sub>2</sub>] ratio in hybrid silicas*

The hybrid silicas are calcined during thermogravimetric analysis (heating from 30 to 830 °C). During this process, two  $\equiv\text{SiO}-\text{CTA}^+$  groups are converted to one  $\equiv\text{SiOH}$  group by the surfactant removal and elimination of one molecule of H<sub>2</sub>O. The mass loss in dihydroxylation region corresponds to water exit, generated by  $\equiv\text{SiOH}$  condensation, including structural silanol (formed during the silica preparation) and silanol groups formed by CTA<sup>+</sup> removal. Structural silanol were calculated by Equation (S2):

$$\frac{[\text{CTA}^+]}{[\text{SiO}_2]} = \frac{\frac{m_4}{MM_{\text{H}_2\text{O}}} - 0.5 \frac{m_{2-3}}{MM_{\text{CTA}^+}}}{\frac{m_{\text{SiO}_2}}{MM_{\text{SiO}_2}}} \quad (\text{S2})$$

where  $m_4$  is the mass loss in the dihydroxylation region and  $MM_{\text{H}_2\text{O}}$  is the molar mass of water.

### Calculation of $TOF_0$

Using the values of derivative curves in 0 min  $(dX_A/dt)_0$ , turnover frequencies ( $TOF_0$ ) were calculated using the  $[CTA^+]/[SiO_2]$  ratios, considering the molar content of catalytic sites equal to this ratio.  $TOF_0$  were obtained using the equation below:

$$TOF_0 = \frac{MM_{SiO_2} C_{A0} V (dX_A/dt)_0}{\%SiO_2 m_{cat} \frac{[CTA^+]}{[SiO_2]}} \quad (S3)$$

where  $C_{A0}$  ( $2.94 \text{ mol.L}^{-1}$ ) is the initial concentration of ethyl acetate,  $m_{cat}$  (0.6667 g) is the mass of catalyst used in each experiment and  $V$  (20.2 mL) is the reactional volume.
